# Supplementary material for: Increased expression levels of Syntaxin 1A and Synaptobrevin 2/Vesicle-Associated Membrane Protein-2 are associated with the progression of bladder cancer
Source: PubMed Central journal article supplement (PMC6428126; doi:10.1590/1678-4685-gmb-2017-0339), 2019-01-21
Supplement: 1415-4757-GMB-1678-4685-GMB-2017-0339-s001.pdf [file 1415-4757-GMB-1678-4685-GMB-2017-0339-s001.pdf]

**Supplementary Material to “Increased expression levels of Syntaxin 1A and Synaptobrevin 2/Vesicle-Associated Membrane Protein-2 are associated with the progression of bladder cancer”**

**Table S1** - Wilcoxon test for Synaptobrevin 2 and Syntaxin1A gene expression in tumor and adjacent control samples

| Gene  | Sample  | N  | Min        | Q1         | Media<br>n | Q3         | Max         | W    | Z          | p-<br>Value                |
|-------|---------|----|------------|------------|------------|------------|-------------|------|------------|----------------------------|
| VAMP2 | Control | 27 | 0.001<br>4 | 0.142<br>6 | 0.531<br>0 | 1.337<br>1 | 5.893<br>4  | 68.0 | -<br>2.895 | <b>0.003</b><br><b>79*</b> |
|       | Tumor   | 27 | 0.215<br>6 | 0.507<br>9 | 1.672<br>2 | 3.307<br>4 | 4.270<br>1  |      | 0          |                            |
| STX1A | Control | 25 | 0.003<br>6 | 0.388<br>8 | 0.742<br>9 | 1.545<br>0 | 3.539<br>6  | 4.0  | -<br>4.251 | <b>0.000</b><br><b>02*</b> |
|       | Tumor   | 25 | 1.189<br>3 | 3.654<br>6 | 5.502<br>2 | 9.359<br>8 | 14.96<br>47 |      | 3          |                            |
