# Supplementary material for: Increased expression levels of Syntaxin 1A and Synaptobrevin 2/Vesicle-Associated Membrane Protein-2 are associated with the progression of bladder cancer
Source: PubMed Central journal article supplement (PMC6428126; doi:10.1590/1678-4685-gmb-2017-0339), 2019-01-21
Supplement: 1415-4757-GMB-1678-4685-GMB-2017-0339-s002.pdf [file 1415-4757-GMB-1678-4685-GMB-2017-0339-s002.pdf]

**Supplementary Material to “Increased expression levels of Syntaxin 1A and Synaptobrevin 2/Vesicle-Associated Membrane Protein-2 are associated with the progression of bladder cancer”**

**Table S2** - Mann-Whitney test for VAMP2 and STX1A analysis in low and high grade tumors.

| Gene  | Sample  | Grade | N  | Min    | Q1     | Median | Q3      | Max     | U       | Z       | p-Value        |
|-------|---------|-------|----|--------|--------|--------|---------|---------|---------|---------|----------------|
| VAMP2 | Control | LG    | 9  | 0.0017 | 0.0205 | 0.4401 | 0.7259  | 5.8934  | 61.0000 | -1.0030 | 0.3159         |
|       |         | HG    | 18 | 0.0014 | 0.1561 | 0.6285 | 1.5460  | 2.9921  |         | 0       |                |
|       | Tumor   | LG    | 9  | 0.2156 | 0.2509 | 0.2960 | 0.5202  | 3.5573  | 16.0000 | -3.3175 | <b>0.0009*</b> |
|       |         | HG    | 18 | 1.1286 | 1.4110 | 2.6252 | 3.5141  | 4.2701  |         |         |                |
|       |         | LG    | 8  | 0.1698 | 0.4572 | 0.7858 | 1.7316  | 1.9603  | 75.0000 | 0.3787  | 0.7049         |
|       |         | HG    | 17 | 0.0036 | 0.3714 | 0.7159 | 1.5450  | 3.5396  |         |         |                |
| STX1A | Control | LG    | 8  | 0.1698 | 0.4572 | 0.7858 | 1.7316  | 1.9603  | 75.0000 | 0.3787  | 0.7049         |
|       |         | HG    | 17 | 0.0036 | 0.3714 | 0.7159 | 1.5450  | 3.5396  |         |         |                |
|       | Tumor   | LG    | 8  | 1.1893 | 1.6221 | 1.9467 | 3.9375  | 4.2067  | 2.0000  | -3.8157 | <b>0.0001*</b> |
|       |         | HG    | 17 | 3.8966 | 5.1424 | 8.6602 | 10.2916 | 14.9647 |         |         |                |

\*At the 0.05 level, the two distributions are significantly different.
