# Supplementary material for: Increased expression levels of Syntaxin 1A and Synaptobrevin 2/Vesicle-Associated Membrane Protein-2 are associated with the progression of bladder cancer
Source: PubMed Central journal article supplement (PMC6428126; doi:10.1590/1678-4685-gmb-2017-0339), 2019-01-21
Supplement: 1415-4757-GMB-1678-4685-GMB-2017-0339-s003.pdf [file 1415-4757-GMB-1678-4685-GMB-2017-0339-s003.pdf]

## Supplementary Material to “Increased expression levels of Syntaxin 1A and Synaptobrevin 2/Vesicle-Associated Membrane Protein-2 are associated with the progression of bladder cancer”

**Table S3A** - Tukey test for specific comparisons of VAMP2 and STX1A gene expression in different tumor stages

| Gene  | Sample  | Compared stages | Mean Diff | SEM     | q Value | LCL      | UCL     | p-value         |
|-------|---------|-----------------|-----------|---------|---------|----------|---------|-----------------|
| VAMP2 | Control | II vs I         | -0.16927  | 0.71489 | 0.33486 | -1.96511 | 1.62657 | 0.96961         |
|       |         | III vs I        | 0.17742   | 0.69475 | 0.36115 | -1.56783 | 1.92266 | 0.96475         |
|       |         | III vs II       | 0.34669   | 0.69475 | 0.70571 | -1.39855 | 2.09194 | 0.87253         |
|       | Tumor   | II vs I         | 1.62099   | 0.52956 | 4.32894 | 0.29072  | 2.95127 | <b>0.01518*</b> |
|       |         | III vs I        | 2.01919   | 0.51464 | 5.54867 | 0.72639  | 3.31198 | <b>0.00202*</b> |
|       |         | III vs II       | 0.3982    | 0.51464 | 1.09423 | -0.8946  | 1.69099 | 0.72268         |
| STX1A | Control | II vs I         | -0.42173  | 0.39081 | 1.52613 | -1.40346 | 0.55999 | 0.53661         |
|       |         | III vs I        | 0.37488   | 0.3798  | 1.39589 | -0.57919 | 1.32894 | 0.59253         |
|       |         | III vs II       | 0.79661   | 0.3798  | 2.96627 | -0.15745 | 1.75067 | 0.11347         |
|       | Tumor   | II vs I         | 4.38413   | 1.27859 | 4.84917 | 1.17226  | 7.596   | <b>0.00651*</b> |
|       |         | III vs I        | 6.56977   | 1.24256 | 7.47732 | 3.44839  | 9.69114 | <b>0.00008*</b> |
|       |         | III vs II       | 2.18564   | 1.24256 | 2.48756 | -0.93574 | 5.30701 | 0.20659         |

\*indicates that the difference in means is significant at the 0.05 level.

**Table S3B** - Kruskal-Wallis ANOVA test for the analysis of VAMP2 and STX1A gene expression in different tumor stages.

| Sample  | Gene  | Tumor stage | N | Min    | Q1     | Median | Q3      | Max     | Chi-Square | p-value        |
|---------|-------|-------------|---|--------|--------|--------|---------|---------|------------|----------------|
| Control | VAMP2 | I           | 8 | 0.0017 | 0.0161 | 0.3060 | 0.8224  | 5.8934  | 1.3339     | 0.5133         |
|         |       | II          | 8 | 0.0014 | 0.0787 | 0.5447 | 1.3528  | 2.6478  |            |                |
|         |       | III         | 9 | 0.0774 | 0.1567 | 0.6803 | 2.4791  | 2.9921  |            |                |
|         | STX1A | I           | 8 | 0.1698 | 0.4572 | 0.7858 | 1.7316  | 1.9603  | 3.2751     | 0.1945         |
|         |       | II          | 8 | 0.0036 | 0.2035 | 0.4861 | 0.8879  | 1.4613  |            |                |
|         |       | III         | 9 | 0.3055 | 0.3863 | 1.0950 | 1.9895  | 3.5396  |            |                |
| Tumor   | VAMP2 | I           | 8 | 0.2156 | 0.2477 | 0.3061 | 0.5264  | 3.5573  | 9.8077     | <b>0.0074*</b> |
|         |       | II          | 8 | 1.3839 | 1.7580 | 2.3255 | 2.8434  | 3.5374  |            |                |
|         |       | III         | 9 | 1.1286 | 1.2477 | 3.3074 | 3.6770  | 4.2701  |            |                |
|         | STX1A | I           | 8 | 1.1893 | 1.6221 | 1.9467 | 3.9375  | 4.2067  | 15.6444    | <b>0.0004*</b> |
|         |       | II          | 8 | 3.8966 | 4.4441 | 5.5794 | 10.1228 | 11.7438 |            |                |
|         |       | III         | 9 | 4.2752 | 7.1879 | 9.1110 | 10.2916 | 14.9647 |            |                |

\*At the 0.05 level, the two distributions are significantly different.
