# Supplementary material for: Increased expression levels of Syntaxin 1A and Synaptobrevin 2/Vesicle-Associated Membrane Protein-2 are associated with the progression of bladder cancer
Source: PubMed Central journal article supplement (PMC6428126; doi:10.1590/1678-4685-gmb-2017-0339), 2019-01-21
Supplement: 1415-4757-GMB-1678-4685-GMB-2017-0339-s004.pdf [file 1415-4757-GMB-1678-4685-GMB-2017-0339-s004.pdf]

**Supplementary Material to “Increased expression levels of Syntaxin 1A and Synaptobrevin 2/Vesicle-Associated Membrane Protein-2 are associated with the progression of bladder cancer”**

**Table S4** - Spearman correlations between VAMP2 with STX1A expression in tumor and adjacent control samples.

|               |                 | VAMP2 Control   | STX1A Control   | VAMP2 Tumor     | STX1A Tumor     |
|---------------|-----------------|-----------------|-----------------|-----------------|-----------------|
| VAMP2 Control | Spearman Corr.  | 1               | <b>0.42923*</b> | -0.06899        | 0.09385         |
|               | <i>p</i> -value | --              | <b>0.03226</b>  | 0.73242         | 0.65546         |
| STX1A Control | Spearman Corr.  | <b>0.42923*</b> | 1               | 0.02538         | 0.02692         |
|               | <i>p</i> -value | <b>0.03226</b>  | --              | 0.90413         | 0.89835         |
| VAMP2 Tumor   | Spearman Corr.  | -0.06899        | 0.02538         | 1               | <b>0.54769*</b> |
|               | <i>p</i> -value | 0.73242         | 0.90413         | --              | <b>0.0046</b>   |
| STX1A Tumor   | Spearman Corr.  | 0.09385         | 0.02692         | <b>0.54769*</b> | 1               |
|               | <i>p</i> -value | 0.65546         | 0.89835         | <b>0.0046</b>   | --              |

two-tailed test of significance was used.

\*Correlation is significant at the 0.05 level
